# Supplementary material
Source: publisher figshare collection journal article supplement (https://acs.figshare.com/ndownloader/files/7267145)
Supplement: Supplementary file 10 [file 7267145]

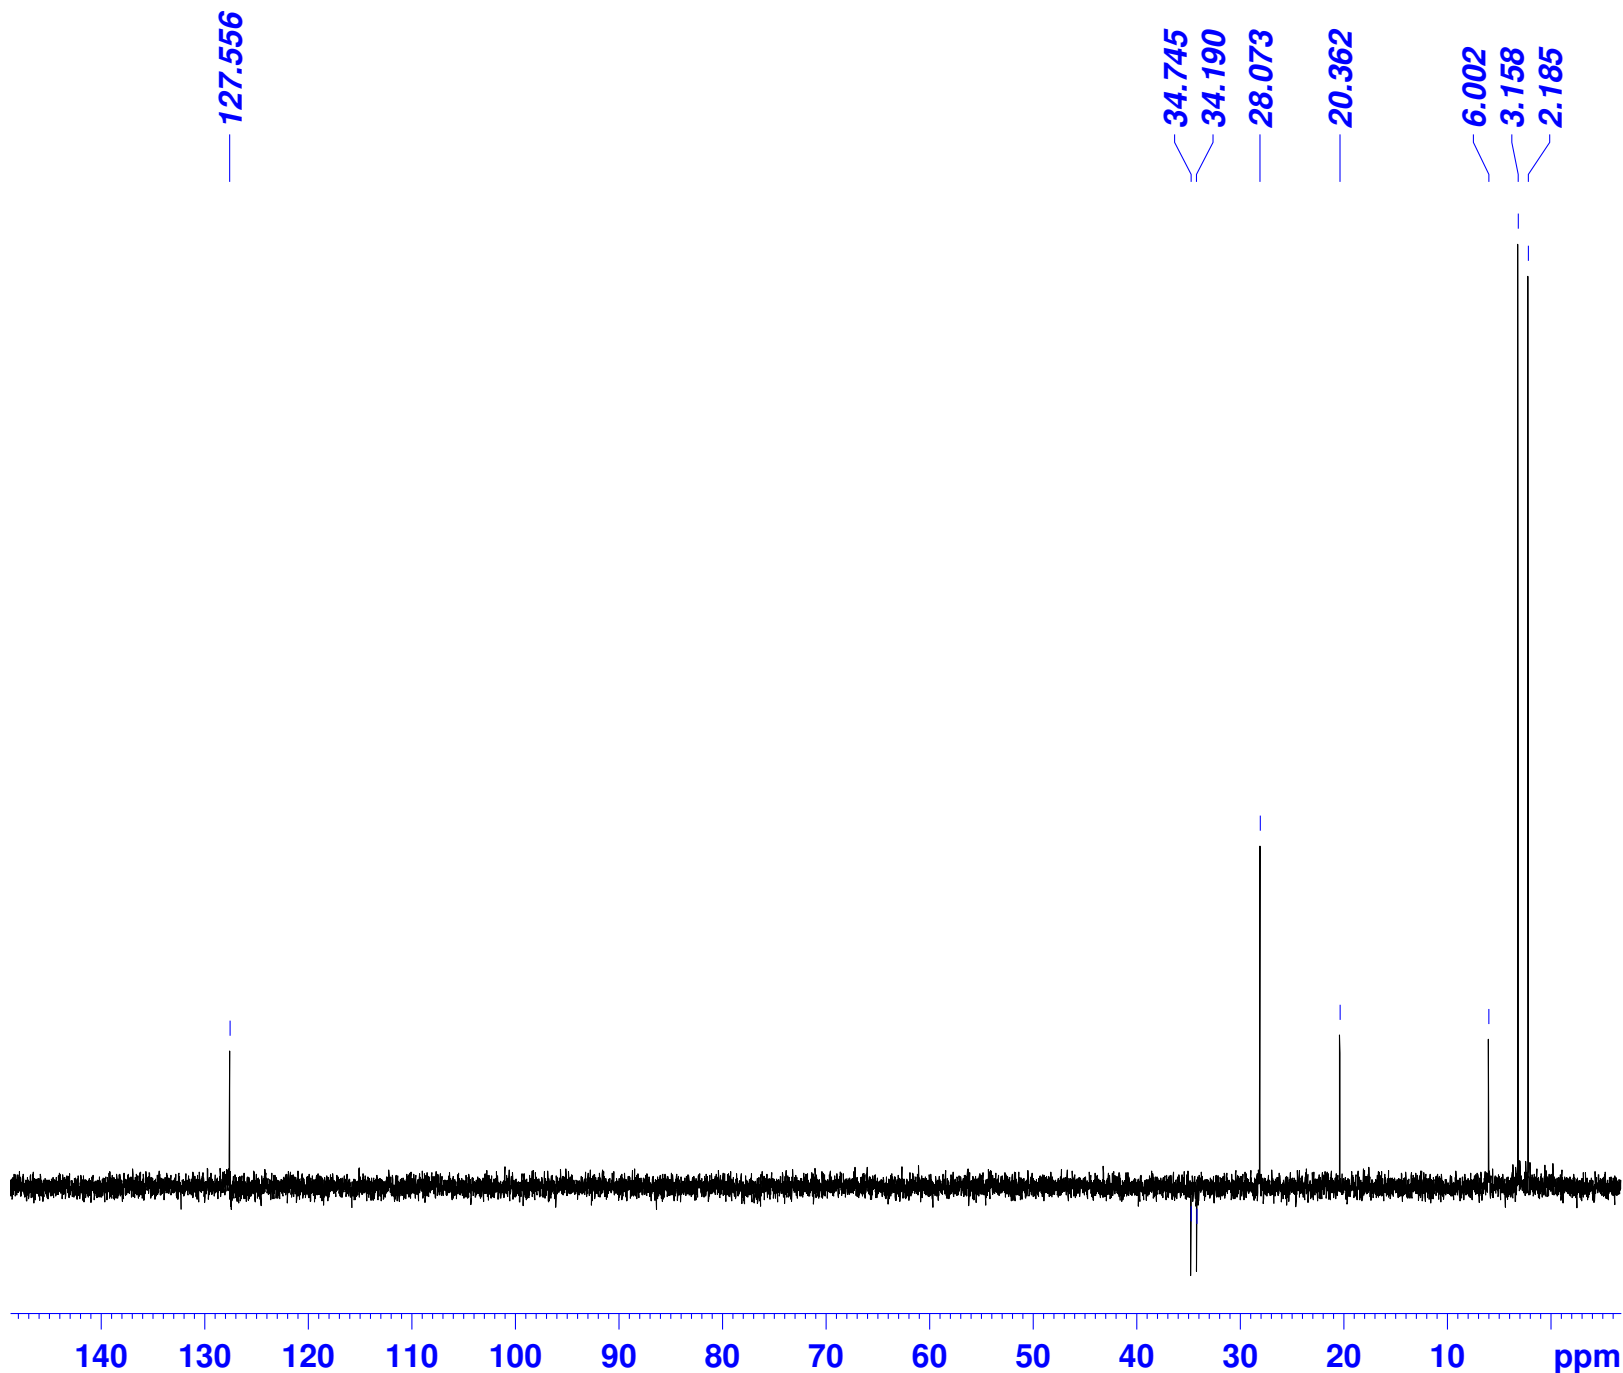

Current Data Parameters  
NAME TK-13-296  
EXPNO 4  
PROCNO 13

F2 - Acquisition Parameters  
Date\_ 20140108  
Time 17.23  
INSTRUM spect  
PROBHD 5 mm PABBO BB/  
PULPROG deptspl35  
TD 65536  
SOLVENT C6D6  
NS 32  
DS 4  
SWH 28846.154 Hz  
FIDRES 0.440157 Hz  
AQ 1.1359574 sec  
RG 188.42  
DW 17.333 usec  
DE 6.50 usec  
TE 297.4 K  
CNST2 145.0000000  
D1 2.00000000 sec  
D2 0.00344828 sec  
D12 0.00002000 sec  
TD0 1

===== CHANNEL f1 =====  
SFO1 125.7703648 MHz  
NUC1 13C  
P1 10.00 usec  
P13 2000.00 usec  
PLW0 0 W  
PLW1 74.00000000 W  
SPNAM[5] Crp60comp.4  
SPOAL5 0.500  
SPOFFS5 0 Hz  
SPW5 11.30599976 W

===== CHANNEL f2 =====  
SFO2 500.1315995 MHz  
NUC2 1H  
CPDPRG[2] waltz16  
P3 12.00 usec  
P4 24.00 usec  
PCPD2 80.00 usec  
PLW2 18.00000000 W  
PLW12 0.40500000 W

F2 - Processing parameters  
SI 32768  
SF 125.7578496 MHz  
WDW EM  
SSB 0  
LB 1.00 Hz  
GB 0  
PC 1.40
