# Supplementary material
Source: publisher figshare collection journal article supplement (https://acs.figshare.com/ndownloader/files/7267145)
Supplement: Supplementary file 12 [file 7267145]

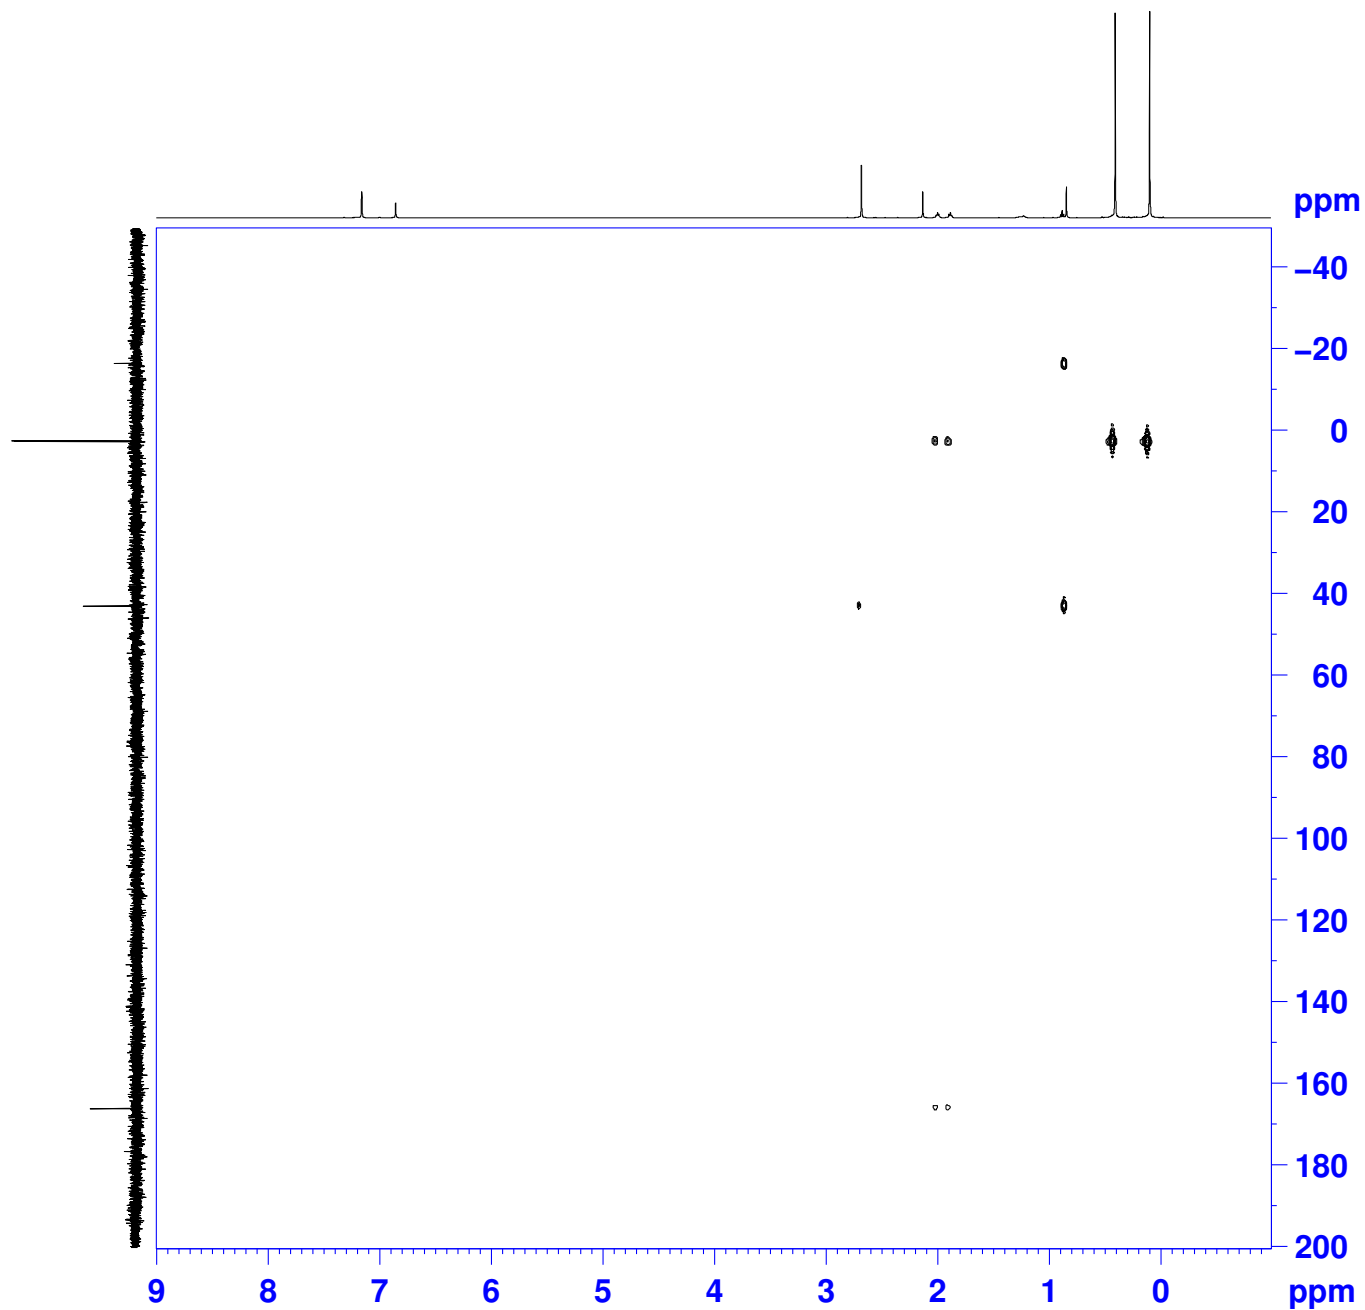

Current Data Parameters  
NAME TK-13-296  
EXPNO 11  
PROCNO 1

F2 - Acquisition Parameters  
Date\_ 20141231  
Time 10.23  
INSTRUM spect  
PROBHD 5 mm PABBO BB/  
PULPROG hmbcgpndqf  
TD 2048  
SOLVENT C6D6  
NS 2  
DS 0  
SWH 5000.000 Hz  
FIDRES 2.441406 Hz  
AQ 0.2048000 sec  
RG 188.42  
DW 100.000 usec  
DE 6.50 usec  
TE 298.7 K  
CNST13 6.0000000  
D0 0.00000300 sec  
D1 10.00000000 sec  
D6 0.08333334 sec  
D16 0.00020000 sec  
IN0 0.00002010 sec

===== CHANNEL f1 =====  
SFO1 500.1320005 MHz  
NUC1 1H  
P1 12.00 usec  
P2 24.00 usec  
PLW1 17.00000000 W

===== CHANNEL f2 =====  
SFO2 99.3692141 MHz  
NUC2 29Si  
P3 11.90 usec  
PLW2 74.00000000 W

===== GRADIENT CHANNEL =====  
GPNAM[1] SMSQ10.100  
GPNAM[2] SMSQ10.100  
GPNAM[3] SMSQ10.100  
GPZ1 70.00 %  
GPZ2 30.00 %  
GPZ3 59.90 %  
P16 1000.00 usec

F1 - Acquisition parameters  
TD 128  
SFO1 99.36921 MHz  
FIDRES 194.340790 Hz  
SW 250.335 ppm  
FnMODE QF

F2 - Processing parameters  
SI 2048  
SF 500.1299978 MHz  
WDW SINE  
SSB 0  
LB 0 Hz  
GB 0  
PC 1.40

F1 - Processing parameters  
SI 1024  
MC2 QF  
SF 99.3617226 MHz  
WDW SINE  
SSB 0  
LB 0 Hz  
GB 0
