# Supplementary material
Source: publisher figshare collection journal article supplement (https://acs.figshare.com/ndownloader/files/7267145)
Supplement: Supplementary file 13 [file 7267145]

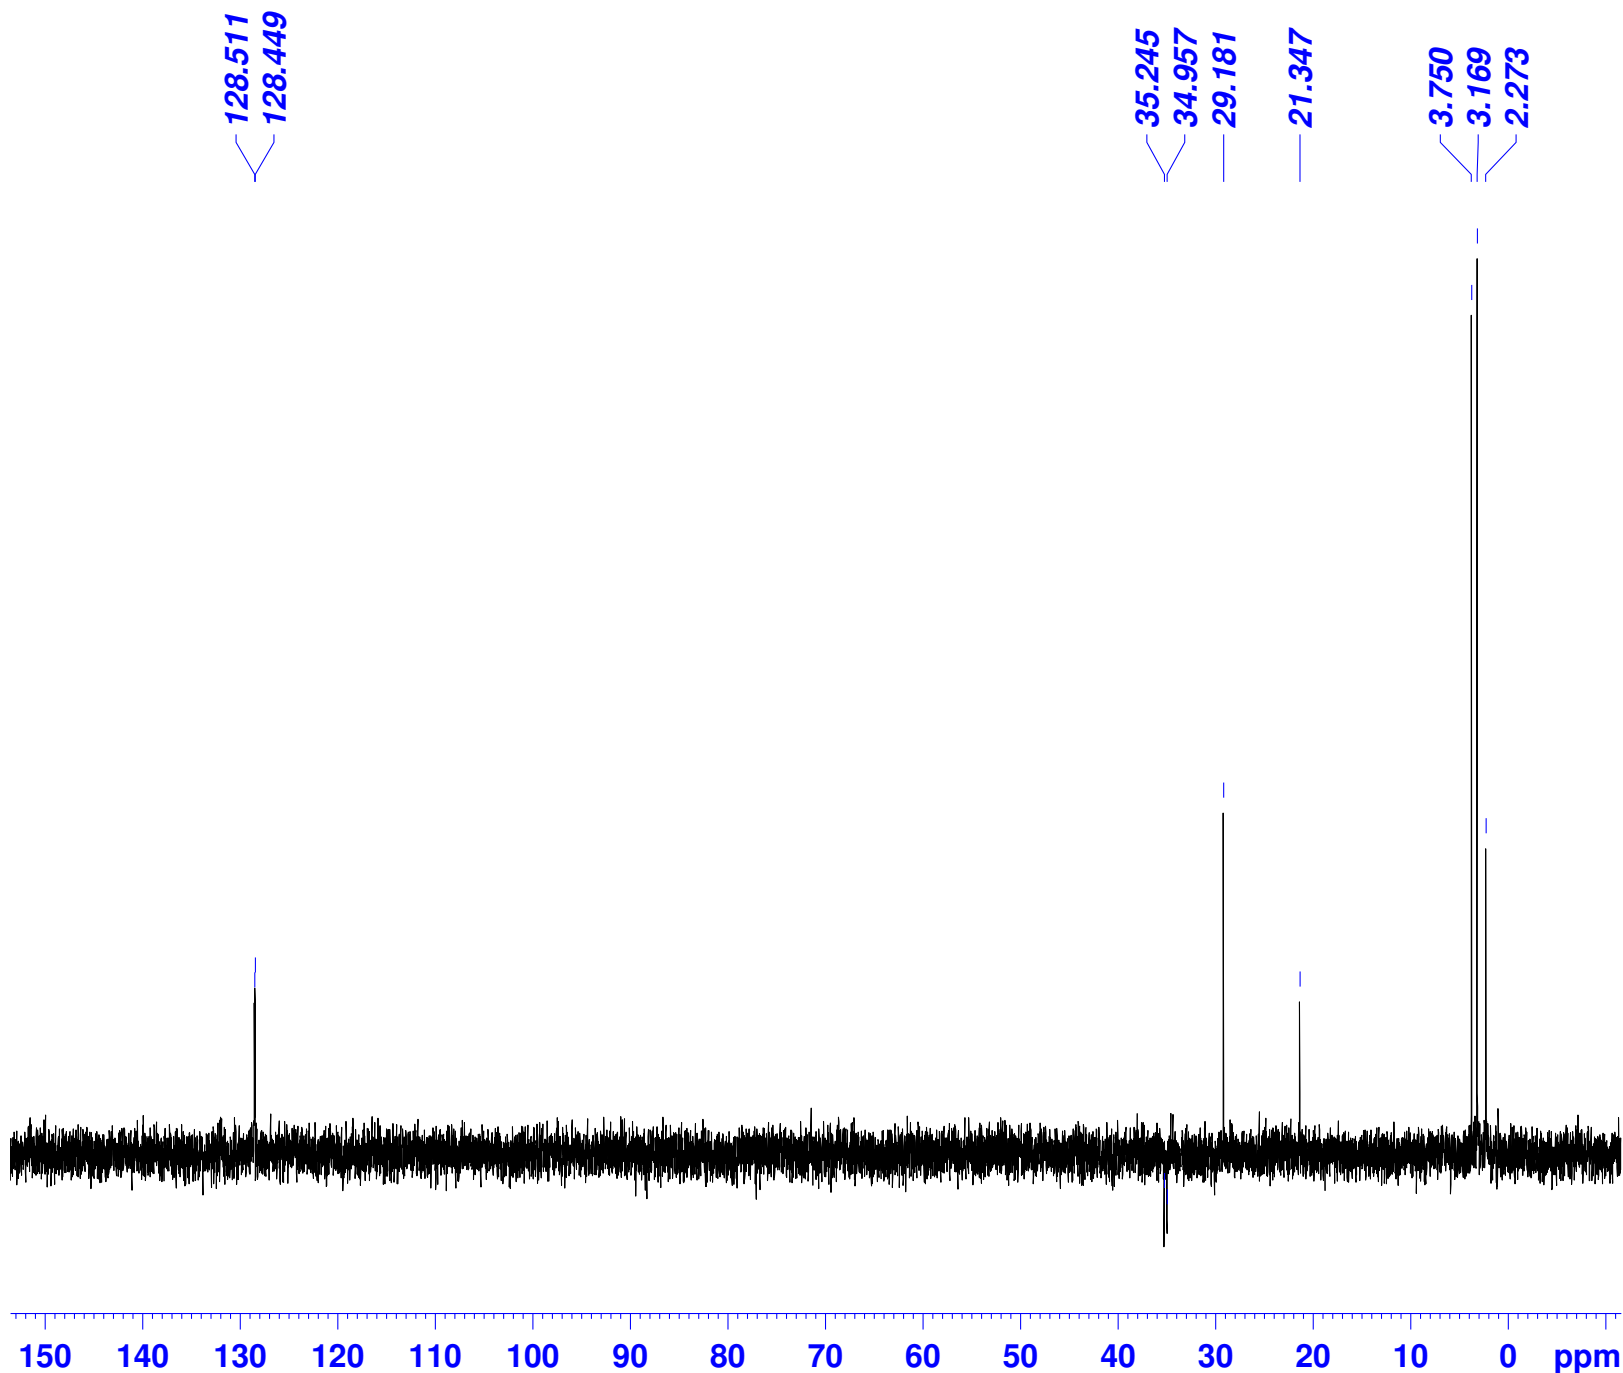

Current Data Parameters  
 NAME TK-13-284  
 EXPNO 12  
 PROCNO 1

F2 - Acquisition Parameters  
 Date\_ 20140411  
 Time 23.53  
 INSTRUM spect  
 PROBHD 5 mm PABBO BB/  
 PULPROG deptspl35  
 TD 65536  
 SOLVENT C6D6  
 NS 1024  
 DS 4  
 SWH 28846.154 Hz  
 FIDRES 0.440157 Hz  
 AQ 1.1359574 sec  
 RG 188.42  
 DW 17.333 usec  
 DE 6.50 usec  
 TE 300.2 K  
 CNST2 145.0000000  
 D1 2.00000000 sec  
 D2 0.00344828 sec  
 D12 0.00002000 sec  
 TD0 1

===== CHANNEL f1 =====  
 SFO1 125.7703648 MHz  
 NUC1 13C  
 P1 10.00 usec  
 P13 2000.00 usec  
 PLW0 0 W  
 PLW1 74.00000000 W  
 SPNAM[5] Crp60comp.4  
 SPOAL5 0.500  
 SPOFFS5 0 Hz  
 SPW5 11.30599976 W

===== CHANNEL f2 =====  
 SFO2 500.1315995 MHz  
 NUC2 1H  
 CPDPRG[2] waltz16  
 P3 12.00 usec  
 P4 24.00 usec  
 PCPD2 80.00 usec  
 PLW2 18.00000000 W  
 PLW12 0.40500000 W

F2 - Processing parameters  
 SI 32768  
 SF 125.7577284 MHz  
 WDW EM  
 SSB 0  
 LB 1.00 Hz  
 GB 0  
 PC 1.40
