# Supplementary material
Source: publisher figshare collection journal article supplement (https://acs.figshare.com/ndownloader/files/7267145)
Supplement: Supplementary file 14 [file 7267145]

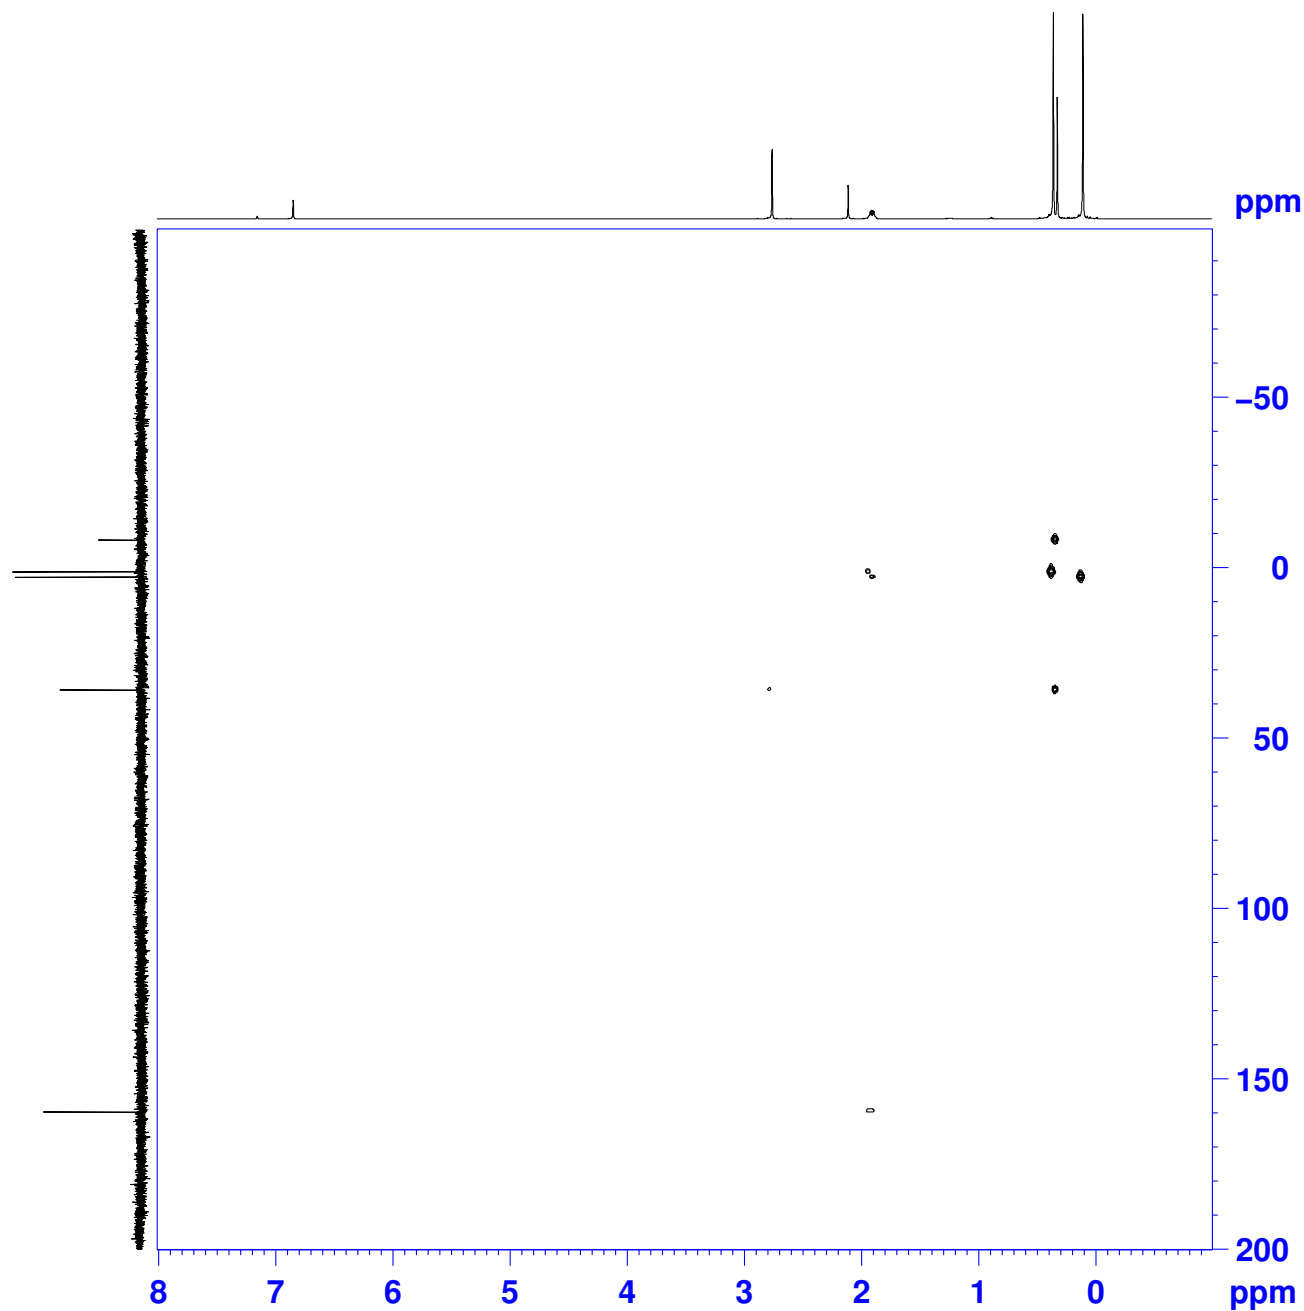

Current Data Parameters  
 NAME TK-14-305  
 EXPNO 9  
 PROCNO 1

F2 - Acquisition Parameters  
 Date\_ 20141101  
 Time 11.21  
 INSTRUM spect  
 PROBHD 5 mm PABBO BB/  
 PULPROG hmbcgpndqf  
 TD 2048  
 SOLVENT C6D6  
 NS 2  
 DS 0  
 SWH 4504.504 Hz  
 FIDRES 2.199465 Hz  
 AQ 0.2273280 sec  
 RG 188.42  
 DW 111.000 usec  
 DE 6.50 usec  
 TE 298.6 K  
 CNST13 6.0000000  
 D0 0.00000300 sec  
 D1 2.00000000 sec  
 D6 0.08333334 sec  
 D16 0.00020000 sec  
 IN0 0.00001680 sec

===== CHANNEL f1 =====  
 SFO1 500.1317505 MHz  
 NUC1 1H  
 P1 12.00 usec  
 P2 24.00 usec  
 PLW1 17.00000000 W

===== CHANNEL f2 =====  
 SFO2 99.3667301 MHz  
 NUC2 29Si  
 P3 11.90 usec  
 PLW2 74.00000000 W

===== GRADIENT CHANNEL =====  
 GPNAM[1] SMSQ10.100  
 GPNAM[2] SMSQ10.100  
 GPNAM[3] SMSQ10.100  
 GPZ1 70.00 %  
 GPZ2 30.00 %  
 GPZ3 59.90 %  
 P16 1000.00 usec

F1 - Acquisition parameters  
 TD 256  
 SFO1 99.36673 MHz  
 FIDRES 116.257439 Hz  
 SW 299.516 ppm  
 FnMODE QF

F2 - Processing parameters  
 SI 2048  
 SF 500.1299954 MHz  
 WDW SINE  
 SSB 0  
 LB 0 Hz  
 GB 0  
 PC 1.40

F1 - Processing parameters  
 SI 1024  
 MC2 QF  
 SF 99.3617226 MHz  
 WDW SINE  
 SSB 0  
 LB 0 Hz  
 GB 0
