# Supplementary material
Source: publisher figshare collection journal article supplement (https://acs.figshare.com/ndownloader/files/7267145)
Supplement: Supplementary file 16 [file 7267145]

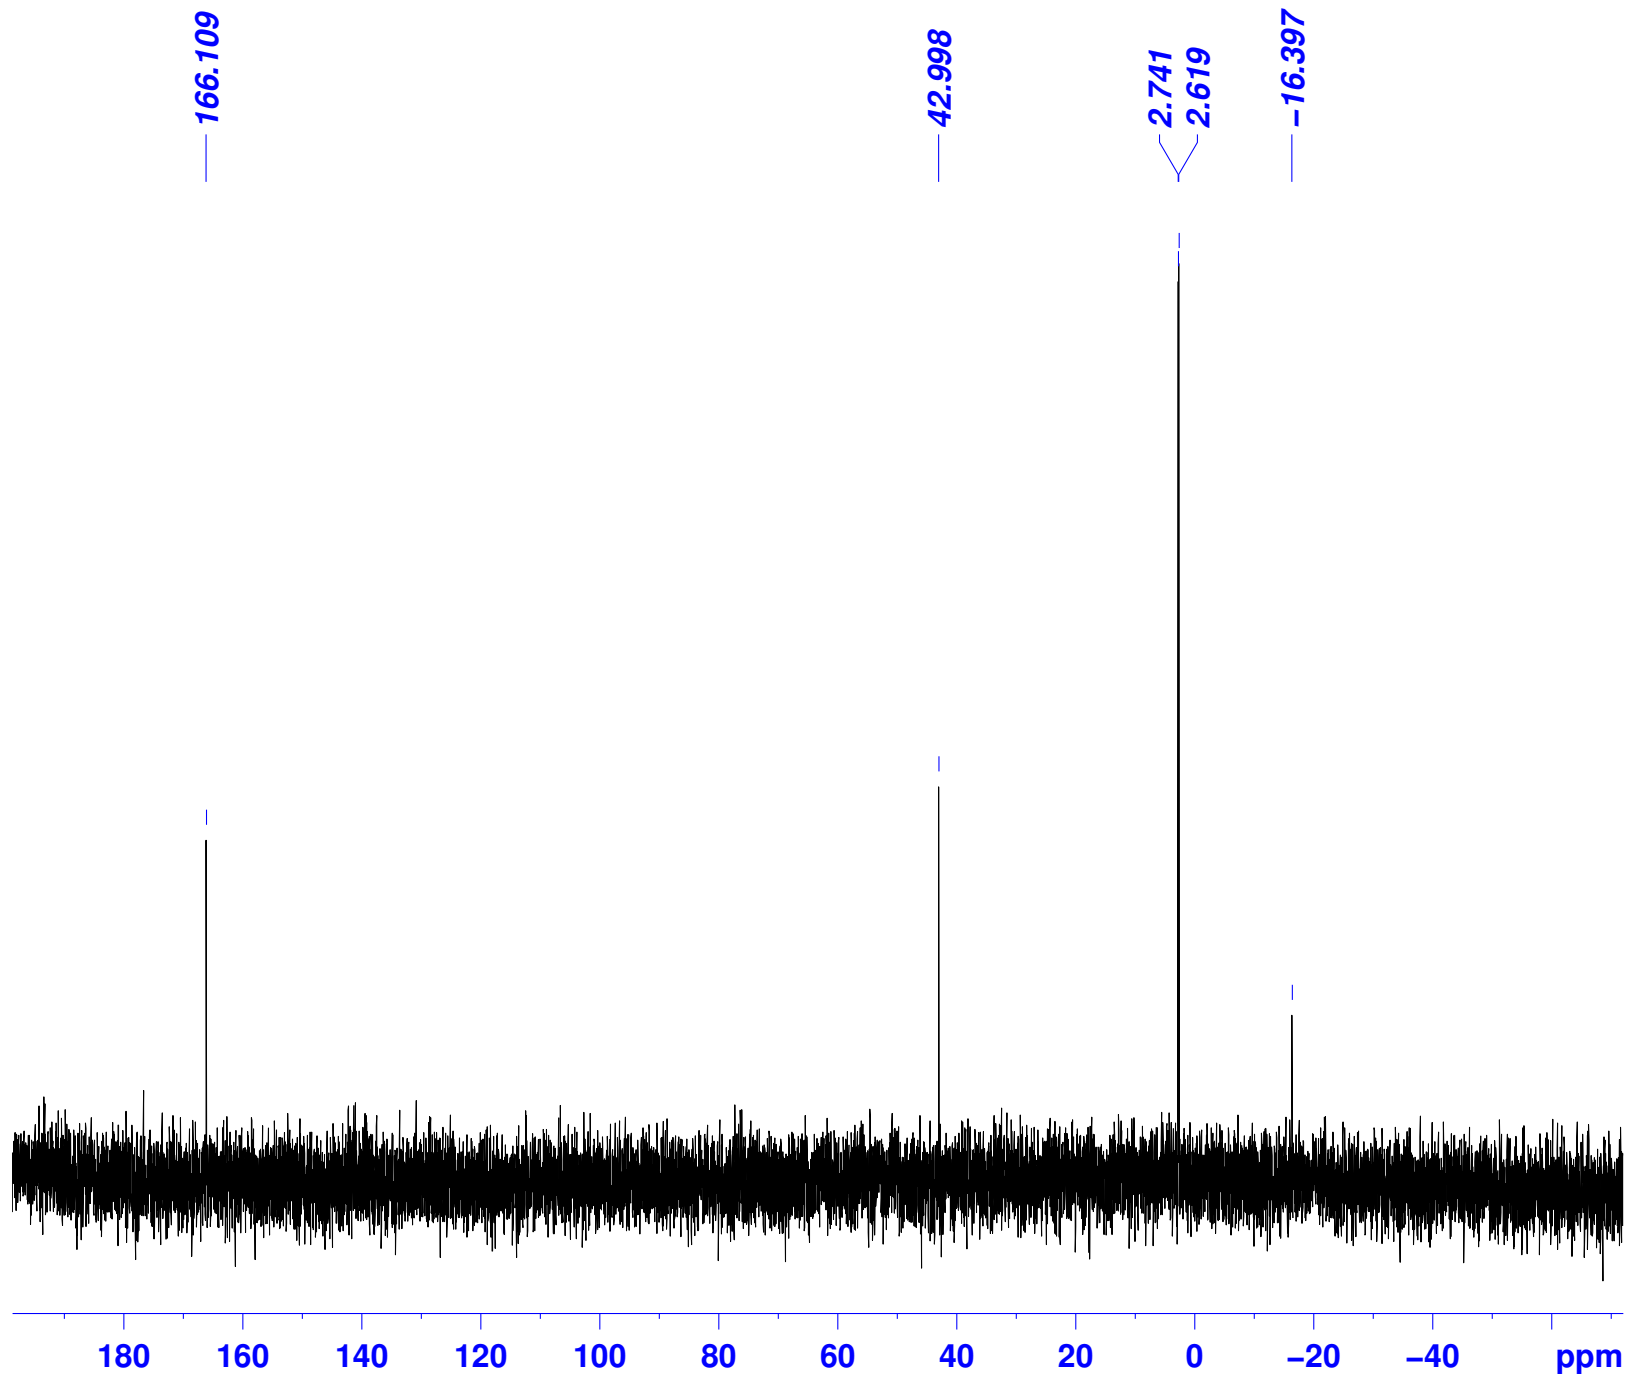

Current Data Parameters  
NAME TK-13-296  
EXPNO 3  
PROCNO 29

F2 - Acquisition Parameters  
Date\_ 20140108  
Time 17.10  
INSTRUM spect  
PROBHD 5 mm PABBO BB/  
PULPROG zgig30  
TD 65536  
SOLVENT C6D6  
NS 48  
DS 4  
SWH 39682.539 Hz  
FIDRES 0.605507 Hz  
AQ 0.8257536 sec  
RG 188.42  
DW 12.600 usec  
DE 6.50 usec  
TE 297.2 K  
D1 15.00000000 sec  
D11 0.03000000 sec  
TD0 1

===== CHANNEL f1 =====  
SFO1 99.3617620 MHz  
NUC1 29Si  
P1 11.90 usec  
PLW1 74.00000000 W

===== CHANNEL f2 =====  
SFO2 500.1320005 MHz  
NUC2 1H  
CPDPRG[2] waltz65  
PCPD2 80.00 usec  
PLW2 18.00000000 W  
PLW12 0.40500000 W

F2 - Processing parameters  
SI 32768  
SF 99.3617226 MHz  
WDW EM  
SSB 0  
LB 1.00 Hz  
GB 0  
PC 1.40
