# Supplementary material
Source: publisher figshare collection journal article supplement (https://acs.figshare.com/ndownloader/files/7267145)
Supplement: Supplementary file 19 [file 7267145]

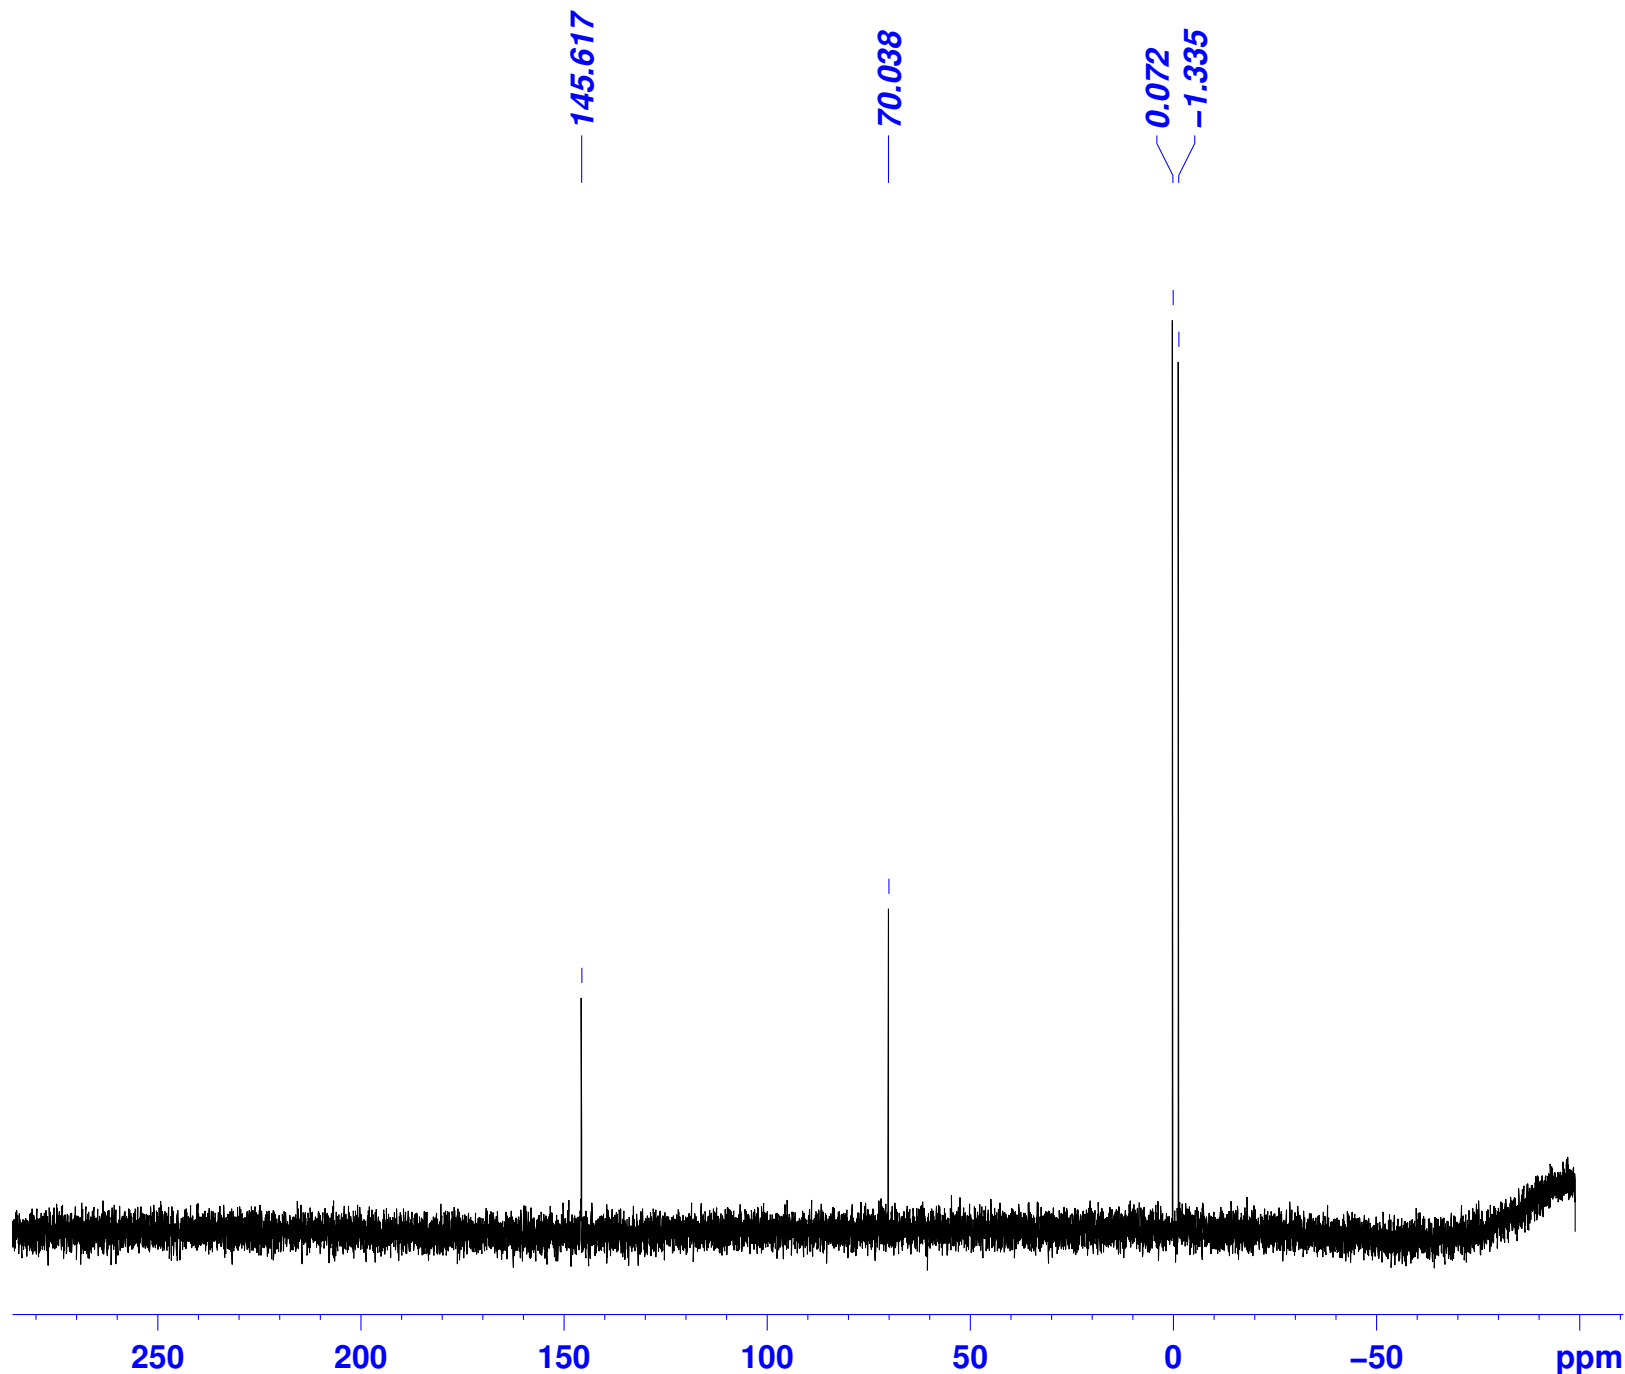

Current Data Parameters  
NAME TK-13-201  
EXPNO 12  
PROCNO 1

F2 - Acquisition Parameters  
Date\_ 20130618  
Time 8.50  
INSTRUM spect  
PROBHD 5 mm PABBO BB/  
PULPROG zgig30  
TD 65536  
SOLVENT C6D6  
NS 1540  
DS 4  
SWH 59523.809 Hz  
FIDRES 0.908261 Hz  
AQ 0.5505024 sec  
RG 188.42  
DW 8.400 usec  
DE 6.50 usec  
TE 300.4 K  
D1 20.00000000 sec  
D11 0.03000000 sec  
TD0 1

===== CHANNEL f1 =====  
SFO1 99.3816344 MHz  
NUC1 29Si  
P1 11.90 usec  
PLW1 74.00000000 W

===== CHANNEL f2 =====  
SFO2 500.1320005 MHz  
NUC2 1H  
CPDPRG[2] waltz65  
PCPD2 90.00 usec  
PLW2 17.50000000 W  
PLW12 0.23367999 W

F2 - Processing parameters  
SI 32768  
SF 99.3617226 MHz  
WDW EM  
SSB 0  
LB 1.00 Hz  
GB 0  
PC 1.40
