# Supplementary material
Source: publisher figshare collection journal article supplement (https://acs.figshare.com/ndownloader/files/7267145)

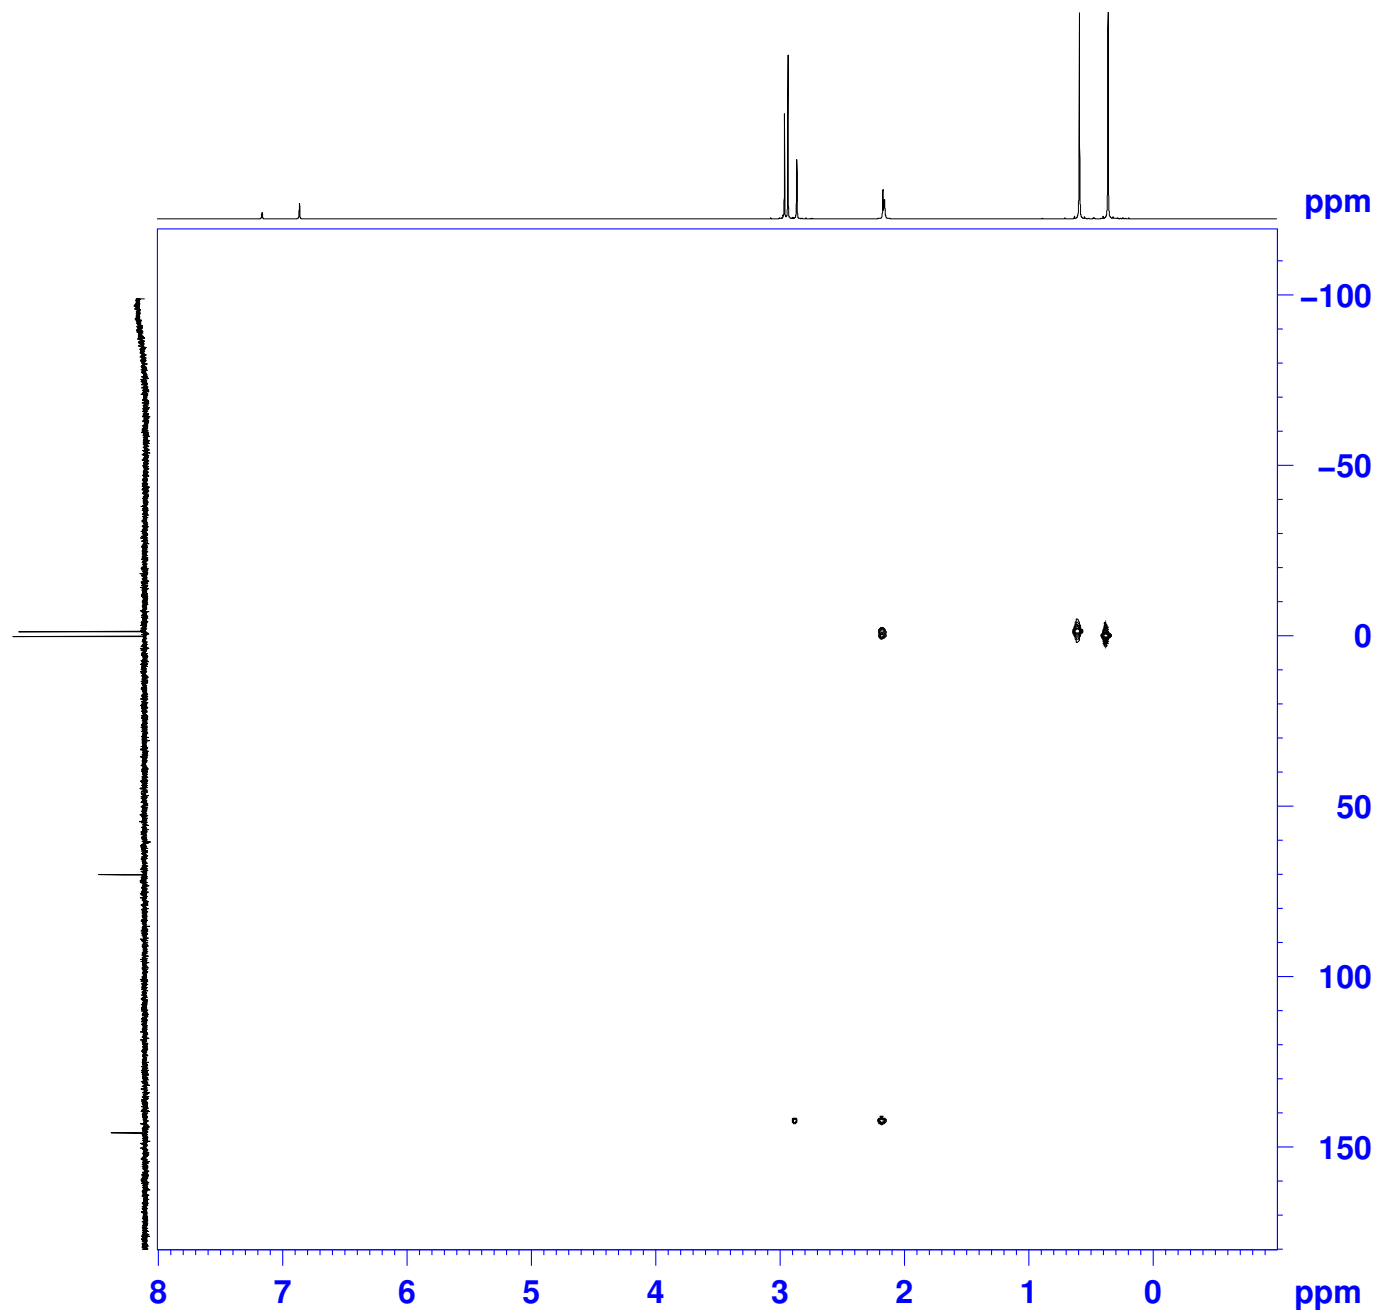

Supplement: Supplementary file 22 [file 7267145]
